# Supplementary material
Source: PubMed Central journal article supplement (PMC4422978)
Supplement: NIHMS685819-supplement-Supplemental_Table_1.pdf [file NIHMS685819-supplement-Supplemental_Table_1.pdf]

**eAppendix 1: List of minor birth defects with corresponding ICD-9-CM codes**

Specified congenital anomalies of lacrimal passages (743.65)

Accessory auricle (744.1)

Other specified anomalies of ear (744.29)

Unspecified anomaly of ear (744.3)

Branchial cleft cyst (744.4)

Other specified anomalies of face and neck (744.89)

Unspecified anomalies of face and neck (744.9)

Single umbilical artery (747.5)

Tongue tie (750.0)

Embryonic cyst of cervix, vagina, and external female genitalia (752.41)

Imperforate hymen (752.42)

Undescended testicle (752.5)

Congenital pes planus (754.61)

Polydactyly (755.0)

Syndactyly, without fusion of bones (755.11, 755.13)

Dermatoglyphic anomalies (757.2)

Vascular hamartomas (757.32)

Congenital pigmentation anomalies of skin (757.33)

Other anomalies of skin (757.39)

Specified anomalies of hair, nails, and breast (757.4, 757.5, 757.6)

Other specified anomalies of integument (757.8)

Unspecified anomalies of integument (757.9)
